Milks, J.R., J. Hibbard and T. P. Rooney. Exfoliating Bark Does Not Protect *Platanus occidentalis* L. From Lianas

# 1 **Exfoliating Bark Does Not Protect *Platanus occidentalis* L. From Root-Climbing**

## 2 **Lianas**

3 James R. Milks, J. Hibbard, and Thomas P. Rooney

4

5 Department of Biological Sciences, Wright State University, Dayton, Ohio 45435

6

7 **Abstract** - Lianas are structural parasites that depress growth, fertility and survival rates  
8 of their hosts, but the magnitude to which they alter these rates differ among host  
9 species. We tested the hypothesis that sycamore (*Platanus occidentalis* L.) would have  
10 fewer adventitious root-climbing lianas. We reasoned that because *P. occidentalis*  
11 possesses exfoliating bark, it would periodically shed newly-established lianas from the  
12 trunk. We investigated the distribution of lianas on the trunks of trees  $\geq 10$  cm DBH in  
13 floodplains in southwestern Ohio. Contrary to predictions, *P. occidentalis* trees had  
14 significantly more root-climbing lianas than expected at three of five sites, and  
15 significantly fewer than expected at one site. In contrast, members of the *Acer* genus  
16 (boxelder (*A. negundo* L.), sugar maple (*A. saccharum* L.) and silver maple (*A.*  
17 *saccharinum* L.) had less than half of the root-climbing lianas as expected. We find no  
18 support for our hypothesis that bark exfoliation protects *P. occidentalis* trees from root-  
19 climbing lianas in our study, and suggest possible mechanisms that might protect *Acer*  
20 species from adventitious root-climbing lianas.

## 21 **Introduction**

22 Lianas are structural parasites that depress growth, fertility and survival rates of their  
23 hosts, but the magnitude to which they alter these rates differs among host species

Milks, J.R., J. Hibbard and T. P. Rooney. Exfoliating Bark Does Not Protect *Platanus occidentalis* From Lianas

24 (Givnish 1992, 1995, Stevens 1987, Ladwig and Meiners 2009, van der Heijden and  
25 Phillips 2009, Ingwell et al. 2010). Different tree species exhibit different mechanisms to  
26 decrease the number of lianas successfully establishing. Proposed mechanisms  
27 include: compound leaves, fragile spines, and ant guards, flexible trunks, long leaves  
28 and high relative growth rates (Putz 1980, 1984, Givnish 1995).

29 Few studies have examined the role of bark shedding as a defense against lianas  
30 (e.g. Talley et al. 1996a; Carsten et al. 2002) and these have been confined to species  
31 in the tropics. Bark shedding would be expected to protect against liana infestation, as  
32 lianas would be expected to be shed along with pieces of bark. This should be  
33 especially effective against root-climbing lianas, as species with this growth form attach  
34 to bark to climb. Talley et al. (1996a) noted that bark shedding reduced lianas in two  
35 species of Australian rainforest trees. Carsten et al. (2002) found a more complex  
36 pattern, as liana densities increased at intermediate levels of bark shedding but  
37 decreased at higher levels of shedding.

38 Temperate floodplains in the eastern United States are well suited for studying  
39 liana/host relationships. Floodplain forests are subject to several factors that increase  
40 liana abundance, including disturbance through periodic flooding (van der Heijden and  
41 Philips 2008) and forest fragmentation (Londré and Schnitzer 2006). Floodplains are  
42 also the primary habitat of *Platanus occidentalis* L., a bark-shedding deciduous tree in  
43 the eastern United States (Burns and Honkala 1990). While bark-shedding has been  
44 hypothesized to protect *P. occidentalis* L. from lianas (Givnish 1992, 1995), no previous  
45 studies to our knowledge have tested this hypothesis.

Milks, J.R., J. Hibbard and T. P. Rooney. Exfoliating Bark Does Not Protect *Platanus occidentalis* L. From Lianas

46 Here, we tested the hypothesis that a temperate zone bark-shedding tree, *P.*  
47 *occidentalis* L., would have fewer root-climbing lianas than co-occurring species that do  
48 not shed bark. We counted the number of root-climbing lianas on tree trunks in five  
49 floodplain forests in southwestern Ohio. We predicted that *Platanus occidentalis* L.  
50 would have fewer lianas than expected compared to non bark-shedding species.

51

52

### Field-site Description

53 This study was conducted in mature floodplain forests at five different parks in the  
54 southwestern Ohio (39°30' N, 84°0' W): Germantown, Huffman Dam, Sugarcreek and  
55 Taylorsville Metroparks in Montgomery County, and The Narrows Preserve in Greene  
56 County. Montgomery County Parks within the Great Miami River Watershed, while The  
57 Narrows Preserve lies within the Little Miami River Watershed. Land use in both  
58 watersheds is predominantly cultivated cropland. Forest cover, pasture, and urban  
59 development are also present. Both watersheds are located within the Till Plains region  
60 of Ohio. This glaciated landscape contains rolling hills, moraines, and outwash plains  
61 (Zimmerman and Runkle 2010).

62 Floodplain forests are comprised of mature deciduous species. *Platanus occidentalis*  
63 L., *Acer negundo* L., *Celtis occidentalis* L., and *Populus deltoides* W. Bartram ex  
64 Marshall were the dominant species at our study sites. The invasive shrub *Lonicera*  
65 *maackii* (Rupr.) Herder is common in the forest shrub layer (Hutchinson and Vankat  
66 1998).

67

68

### Methods

Milks, J.R., J. Hibbard and T. P. Rooney. Exfoliating Bark Does Not Protect *Platanus occidentalis* From Lianas

69 We recorded the diameter at breast height (DBH) and species of each tree  $\geq 10$  cm  
70 DBH in a single 10 m x 300 m belt transects (total 0.3 ha) in mature floodplain forests at  
71 five different parks. Each park was considered a separate site. Transects were  
72 randomly placed within the forests but in most cases, transects were within 50 meters of  
73 forest edges due to the narrow dimensions and fragmented nature of the floodplain  
74 forests in this region.

75 We tallied the number of adventitious root-climbing lianas present on the trunk of  
76 each tree at 1.6 m above ground level at the same time as the DBH measurements.  
77 Adventitious root-climbing lianas were chosen as they should be susceptible to being  
78 shed by trees with exfoliating bark. Data was collected in the spring over two field  
79 seasons (2007-2008).

80 We generated mean ( $\pm$  SE) lianas per tree, importance values and expected  
81 numbers of lianas per tree species for each site. For the purposes of our analyses, we  
82 combined *Fraxinus americana* and *Fraxinus pennsylvanica* into *Fraxinus* sp., as the two  
83 species are virtually indistinguishable in the field in our area. Importance values for each  
84 tree species were calculated by adding relative DBH and relative densities for each  
85 species, then dividing by 2 and multiplying by 100. We calculated relative DBH by  
86 dividing the total DBH for each species by the total DBH for all trees at the site.  
87 Relative density was calculated totaling all individual stems per species and dividing by  
88 the total individual stems per site. Relative DBH was used as we expected larger trees  
89 to host more lianas than smaller trees due to increased age and having more surface  
90 area to which lianas could attach (Talley et al. 1996a, Buron et al. 1998, Carsten et al.  
91 2002, Reddy and Parthasarathy 2006, Leicht-Young, et al. 2010). To test if this pattern

Milks, J.R., J. Hibbard and T. P. Rooney. Exfoliating Bark Does Not Protect *Platanus occidentalis* L. From Lianas

92 held for our sites, we analyzed the number of lianas per tree versus DBH with a hurdle  
93 model for zero-inflated poisson distributions, using the pscl package for R (Zeileis et al.  
94 2008, Jackson 2011, R Development Core Team 2011).

95 After finding a significant relationship between number of lianas and DBH, we  
96 examined differences in number of lianas per cm DBH per tree species and site using a  
97 two-way ANOVA with a post-hoc Tukey Honestly Significant Difference test. Finding a  
98 significant interaction term between site and species, we then analyzed differences  
99 between observed and expected lianas per tree species with replicated goodness of fit  
100 (G) tests, with each site as a replicate. We obtained expected numbers of lianas for  
101 each site and for each tree species by multiplying importance value for each tree  
102 species by the total number of lianas counted at each site.

103

104

## Results

105 We measured 1541 trees comprising 18 species and counted 1967 root-climbing  
106 lianas (mostly *Toxicodendron radicans* (L.) Kuntze and a few *Parthenocissus*  
107 *quinquefolia* (L.) Planch.) in a total of 1.5 ha (Table 1). Of those 18 tree species, *P.*  
108 *occidentalis* L. and *Acer negundo* L. had the highest importance values at 32.3 and  
109 23.2, respectively. Larger trees were significantly more likely to have at least one liana  
110 than smaller trees ( $\beta_1 = 0.025 \pm 0.003$  SE,  $P < 0.0001$ , Fig. 1a) and the number of  
111 lianas per tree also increased with DBH ( $\beta_1 = 0.018 \pm 0.001$  SE,  $P < 0.0001$ , Fig. 1b).  
112 Sites differed greatly in liana abundance, from a low of  $0.0042 \pm 0.008$  SE lianas per cm  
113 DBH per tree at Germantown to a high of  $0.059 \pm 0.004$  SE lianas per cm DBH per tree  
114 at Huffman ( $F = 36.3$ ,  $P < 0.0001$ , Table 2, Fig. 2). There was a significant interaction

Milks, J.R., J. Hibbard and T. P. Rooney. Exfoliating Bark Does Not Protect *Platanus occidentalis* From Lianas

115 term between site and species ( $F = 4.91$ ,  $P < 0.0001$ , Table 2), which was then  
116 examined using G-tests.

117 We found that the number of root-climbing lianas growing on *P. occidentalis* was  
118 significantly greater than expected at three of five sites, significantly less at one site and  
119 did not differ from expected abundance at the remaining site (Table 3). When data  
120 were pooled across sites, *P. occidentalis* had 30% more root-climbing lianas than  
121 expected (pooled  $G = 73.6$ , d.f. = 1,  $P < 0.001$ ). In contrast, *A. negundo* had significantly  
122 fewer lianas than expected at three sites and did not differ from expected abundance at  
123 two sites (Table 3). When data were pooled across sites, *A. negundo* had 59% fewer  
124 root-climbing lianas than expected (pooled  $G = 222.2$ , d.f. = 1,  $P < 0.0001$ ). *Acer*  
125 *saccharinum* had 76.5% fewer lianas at all three sites where individuals of this species  
126 occurred (pooled  $G = 32.8$ , d.f. = 1,  $P < 0.0001$ ; Table 3). A third maple species, *Acer*  
127 *saccharum*, had 83% fewer lianas than expected at the one site we found it ( $G = 45.8$ ,  
128 d.f. = 1,  $P < 0.0001$ ). Other species exhibited idiosyncratic relationships between site  
129 and liana abundance. *Fraxinus* spp. had significantly more lianas than expected at one  
130 site ( $G = 45.3$ , d.f. = 1,  $P < 0.0001$ ) but fewer than expected at two other sites ( $G = 31.8$ ,  
131 d.f. = 1,  $P < 0.0001$  and  $G = 13.7$ , d.f. = 1,  $P < 0.0002$ ; Table 3). When combined  
132 across all sites, there was no significant relationship (pooled  $G = 0.38$ , d.f. = 1,  $P =$   
133  $0.54$ ). A fifth species (*Celtis occidentalis* L.) had significantly more lianas than expected  
134 at two sites ( $G = 131.50$ , d.f. = 1,  $P < 0.0001$  and  $G = 33.96$ , d.f. = 1,  $P < 0.0001$ ),  
135 significantly fewer than expected at two sites ( $G = 5.81$ , d.f. = 1,  $P = 0.016$  and  $G =$   
136  $10.4$ , d.f. = 1,  $P = 0.0013$ ), and no significant difference at the fifth ( $G = 3.00$ , d.f. = 1,  $P$

Milks, J.R., J. Hibbard and T. P. Rooney. Exfoliating Bark Does Not Protect *Platanus occidentalis* L. From Lianas

137 = 0.083, Table 3). When combined across sites, *C. occidentalis* had 61% more vines  
138 than expected (pooled  $G = 114.7$ , d.f. = 1,  $P < 0.0001$ ).

139

140

## Discussion

141 We find no support from our data for the hypothesis that bark shedding protects *P.*  
142 *occidentalis* from root-climbing lianas. *P. occidentalis* had either the same as or more  
143 than the expected number of lianas at four sites out of five sites whereas we predicted  
144 that *P. occidentalis* should have fewer than expected lianas. This contrasts with Talley  
145 et al. (1996a) who found that bark-shedding trees in Queensland tropical forests had  
146 fewer than expected root-climbing lianas. Carsten et al. (2002) found that root-climbing  
147 lianas increased on trees with intermediate bark roughness and levels of bark-shedding  
148 and decreased at high levels of shedding and on trees with smooth bark. It is possible  
149 that *P. occidentalis* would be fall within the intermediate range of the bark texture scale  
150 of Carsten et al. (2002). One possible test would be to compare individual *P.*  
151 *occidentalis* for differences in bark shedding levels and liana load as individual *P.*  
152 *occidentalis* vary in levels of bark shedding with some trees shedding nearly all bark  
153 and others shedding very little (Milks, personal observation).

154 In contrast to *P. occidentalis*, *A. negundo*, *A. saccharum*, and *A. saccharinum* had  
155 either the expected number of lianas or significantly fewer lianas than expected on all  
156 sites where those species occurred. Other studies have also noted fewer than  
157 expected lianas on *A. saccharum*. Both Talley et al. (1996b) and Leicht-Young et al.  
158 (2010) found fewer than expected *T. radicans* lianas on *A. saccharum* in forests in  
159 Alabama, Indiana and Michigan. However, our finding of fewer than expected lianas on

Milks, J.R., J. Hibbard and T. P. Rooney. Exfoliating Bark Does Not Protect *Platanus occidentalis* From Lianas

160 *A. saccharinum* contrasts with Leicht-Young et al.'s (2010) finding. Only 2.3% of *A.*  
161 *saccharinum* in our study were infested with lianas whereas Leicht-Young et al. found  
162 an infestation rate of 28.6%. The reasons for this difference likely lie in differences in  
163 our methods, as we focused on root-climbing lianas whereas Leicht-Young et al. (2010)  
164 included all lianas, regardless of climbing mode. Another possible reason may be due  
165 to differences in the dominant liana species. Our dominant root-climbing species was *T.*  
166 *radicans* whereas *P. quinquefolia* dominated the liana community in Leicht-Young et  
167 al.'s (2010) study.

168 Other tree species in our study (like *Fraxinus* sp. and *C. occidentalis*) showed no  
169 consistent trend between site and liana abundance, with some sites having more than  
170 expected lianas, others having fewer than expected. Site differences are apparent in  
171 our data, especially between Germantown and the other sites (Fig. 1). The reasons for  
172 those large differences in liana abundance between sites are not clear and may simply  
173 represent spatial heterogeneity.

174 Possible reasons for the differences between liana abundance between *P.*  
175 *occidentalis* and *A. negundo*, *A. saccharum* and *A. saccharinum* include leaf size, bark  
176 morphology and bark chemistry. Putz (1984) found that larger leaf size protected trees  
177 from lianas on Barro Colorado Island. However, in our area, *P. occidentalis* generally  
178 has larger leaves than any of the *Acer* species, making leaf size an unlikely mechanism  
179 in eastern temperate floodplain forests.

180 Bark morphology (smooth versus furrowed) is also unlikely to be an important  
181 mechanism, as this has been tested in other forest types with mixed results (Boom and  
182 Mori 1982, Carsten et al. 2002). In our study, *A. saccharum* and *A. negundo* had



Milks, J.R., J. Hibbard and T. P. Rooney. Exfoliating Bark Does Not Protect *Platanus occidentalis* L. From Lianas

183 slightly furrowed bark whereas *A. saccharinum* had rough, furrowed bark. None of  
184 these three had many lianas, as only 14.1% of *A. negundo*, 13.3% of *A. saccharum* and  
185 2.3% of *A. saccharinum* had lianas (Table 1). Bark morphology by itself is unlikely to  
186 explain our results, although it warrants further study.

187 One unexplored possibility is that allelopathic chemicals in the bark of some maple  
188 species may protect them from root-climbing lianas. Talley et al. (1996b) found  
189 allelopathic chemicals in *A. saccharum* bark (as well as chemicals in the bark of other  
190 tree species) could inhibit liana seedling germination and growth in the southern US,  
191 with differences in the presence of allelopathic chemicals influencing liana distributions  
192 on host trees. Talley et al. (1996a) found similar patterns in Australia. It is possible that  
193 bark chemistry may also protect *Acer* species from clinging lianas in our study region,  
194 although our study did not investigate that possibility.

195 This study is, to our knowledge, the first study that demonstrates that bark shedding  
196 in *P. occidentalis* does not protect that species from liana infestation. We also showed  
197 that *A. negundo* has either the same or fewer than expected lianas, which is also a new  
198 finding. Further research into the characteristics that decrease root-climbing liana  
199 abundance on *A. negundo* is desirable. Future investigations could also examine host  
200 preferences for different species of lianas in temperate floodplains, and whether  
201 variability in bark shedding among individual *P. occidentalis* individuals affects liana  
202 loads.

203

204

## Acknowledgements

Milks, J.R., J. Hibbard and T. P. Rooney. Exfoliating Bark Does Not Protect *Platanus occidentalis* From Lianas

205 The idea for this project was first suggested by T. Givnish in his class entitled The  
206 Vegetation of Wisconsin.

207

### 208 **Literature Cited**

209 Boom, B. M. and S. A. Mori. 1982. Falsification of two hypotheses on liana exclusion  
210 from tropical trees possessing buttresses and smooth bark. *Bulletin of the Torrey*  
211 *Botanical Club*, 109:447-450.

212 Buron, J., D. Lavigne, K. Grote, R. Takis and O. Sholes. 1998. Association of vines and  
213 trees in second-growth forest. *Northeastern Naturalist* 5:359-362.

214 Burns, R. M. and B. H. Honkala. 1990. *Silvics of North America: 2. Hardwoods*.  
215 Agriculture Handbook 654, U.S. Dept. of Agriculture Forest Service, Washington,  
216 D.C.

217 Carsten, L.D., F. A. Juola, T.D. Male and S. Cherry. 2002. Host associations of lianas in  
218 a south-east Queensland rainforest. *Journal of Tropical Ecology* 18:107-120.

219 Givnish, T. J. 1995. Plant stems: biomechanical adaptation for energy capture and  
220 influence on species distributions, p. 3-49 in B. L. Gartner, ed. *Plant stems:*  
221 *physiology and functional morphology*. Academic Press, San Diego.

222 Givnish, T. J. 1992. Nature green in leaf and tendril. *Science* 256:1339-1341.

223 Hutchinson, T. F. and J. L. Vankat. 1998. Landscape structure and spread of the exotic  
224 shrub *Lonicera maackii* (Amor honeysuckle) in southwestern Ohio forests. *American*  
225 *Midland Naturalist* 139:383-390.

Milks, J.R., J. Hibbard and T. P. Rooney. Exfoliating Bark Does Not Protect *Platanus occidentalis* L. From Lianas

- 226 Ingwell, L. L., S. J. Wright, K. K. Becklund, S. P. Hubbell and S. A. Schnitzer. 2010. The  
227 impact of lianas on 10 years of tree growth and mortality on Barro Colorado Island,  
228 Panama. *Journal of Ecology* 98:879-887.
- 229 Jackman, S. 2011. *pscl: Classes and Methods for R Developed in the Political Science*  
230 *Computational Laboratory, Stanford University*. Department of Political Science,  
231 Stanford University, Stanford, California. R package version 1.03.10.
- 232 Ladwig, L. M. and S. J. Meiners. 2009. Impacts of temperate lianas on tree growth in  
233 young deciduous forests. *Forest Ecology and Management* 259:195-200.
- 234 Leicht-Young, S. A., N. B. Pavlovic, K. J. Frohnapple and R. Grundel .2010. Liana  
235 habitat and host preferences in northern temperate forests. *Forest Ecology and*  
236 *Management*, 260:1467-1477.
- 237 Londré, R. A. and S. A. Schnitzer. 2006. The distribution of lianas and their change in  
238 abundance in temperate forests over the past 45 years. *Ecology* 87:2973-2978.
- 239 Putz, F. E. 1980. Lianas vs. trees. *Biotropica* 12:224-225.
- 240 Putz, F. E. 1984. How trees avoid and shed lianas. *Biotropica* 16:19-23.
- 241 R Development Core Team 2011. *R: A language and environment for statistical*  
242 *computing*. R Foundation for Statistical Computing, Vienna, Austria.
- 243 Reddy, M. S. and N. Parthasarathy. 2006. Liana diversity and distribution on host trees  
244 in four inland tropical dry evergreen forests of peninsular India. *Tropical Ecology*  
245 47:109-123.
- 246 Stevens, G. C. 1987. Lianas as structural parasites: The *Bursera simaruba* example.  
247 *Ecology* 68:77-81.

Milks, J.R., J. Hibbard and T. P. Rooney. Exfoliating Bark Does Not Protect *Platanus occidentalis* From Lianas

- 248 Talley, S.M., W. N. Setzer and B. R. Jackes. 1996a. Host associations of two  
249 adventitious-root-climbing vines in a north Queensland tropical rain forest. *Biotropica*  
250 28:361-366.
- 251 Talley, S.M., R. O. Lawton and W. N. Setzer. 1996b. Host preferences of *Rhus radicans*  
252 (Anacardiaceae) in a southern deciduous hardwood forest. *Ecology*, 77:1271-1276.
- 253 Van der Heijden, G. M. F. and O. L. Phillips. 2008. What controls liana success in  
254 Neotropical forests? *Global Ecology and Biogeography* 17:373-383.
- 255 Van der Heijden, G. M. F. and O. L. Phillips. 2009. Liana infestation impacts tree growth  
256 in a lowland tropical moist forest. *Biogeosciences* 6:2217-2226.
- 257 Zeileis, A., C. Kleiber and S. Jackman. 2008. Regression models for count data in R.  
258 *Journal of Statistical Software* 27:1-25.
- 259 Zimmerman, C.L. and J. R. Runkle. 2010. Using ecological land units for conservation  
260 planning in a southwestern Ohio watershed. *Natural Areas Journal* 30:27-38.
- 261

Milks, J.R., J. Hibbard and T. P. Rooney. Exfoliating Bark Does Not Protect *Platanus occidentalis* L. From Lianas

261

262 Table Legend

263 **Table 1.** Species of trees, sites the species occurred at (sites), number of individual  
264 trees (n), number of lianas found on each species of tree, percentage of trees with at  
265 least one root-climbing liana clinging to them, and importance values per tree species  
266 for all sites combined. Sites are as follows: G = Germantown, H = Huffman Dam, N =  
267 The Narrows, S = Sugarcreek, and T = Taylorsville.

268

Milks, J.R., J. Hibbard and T. P. Rooney. Exfoliating Bark Does Not Protect *Platanus occidentalis* From Lianas

268  
269

| Species                        | Sites         | n           | No. root-climbing lianas | Percent of trees Infested | Importance Value |
|--------------------------------|---------------|-------------|--------------------------|---------------------------|------------------|
| <i>Acer negundo</i>            | G, H, N, S, T | 432         | 169                      | 14.1                      | 23.2             |
| <i>Acer saccharum</i>          | N             | 30          | 4                        | 13.3                      | 1.4              |
| <i>Acer saccharinum</i>        | G, H, T       | 88          | 10                       | 2.3                       | 5.8              |
| <i>Aesculus glabra</i>         | G, H, N, S, T | 88          | 67                       | 37.5                      | 4.7              |
| <i>Celtis occidentalis</i>     | G, H, N, S, T | 163         | 482                      | 71.8                      | 10.1             |
| <i>Crataegus sp.</i>           | H             | 2           | 2                        | 100                       | 0.1              |
| <i>Fraxinus sp.</i>            | H, N, S, T    | 65          | 85                       | 21.5                      | 3.7              |
| <i>Juglans nigra</i>           | G, H, N, S, T | 25          | 51                       | 36.0                      | 1.9              |
| <i>Liriodendron tulipifera</i> | S             | 26          | 11                       | 23.1                      | 1.5              |
| <i>Maclura pomifera</i>        | H, T          | 28          | 56                       | 64.3                      | 1.8              |
| <i>Morus alba</i>              | H             | 2           | 0                        | 0                         | 0.1              |
| <i>Platanus occidentalis</i>   | G, H, N, S, T | 405         | 735                      | 42.2                      | 32.3             |
| <i>Populus deltoides</i>       | H, T          | 71          | 167                      | 39.4                      | 7.1              |
| <i>Prunus serotina</i>         | S             | 8           | 13                       | 37.5                      | 0.4              |
| <i>Robinia psuedoacacia</i>    | T             | 2           | 8                        | 100                       | 0.1              |
| <i>Tilia americana</i>         | H             | 4           | 0                        | 0                         | 0.3              |
| <i>Ulmus americana</i>         | G, H, N       | 60          | 43                       | 30.0                      | 3.1              |
| <i>Ulmus rubra</i>             | H, T          | 42          | 64                       | 42.9                      | 2.3              |
| <b>Total</b>                   |               | <b>1541</b> | <b>1967</b>              | <b>32.8</b>               | <b>99.9</b>      |

270  
271

Milks, J.R., J. Hibbard and T. P. Rooney. Exfoliating Bark Does Not Protect *Platanus occidentalis* L. From Lianas

271

272 Table Legend

273 **Table 2.** Variation in the number of lianas per cm DBH attributable to tree species, site

274 and their interaction.

275

Milks, J.R., J. Hibbard and T. P. Rooney. Exfoliating Bark Does Not Protect *Platanus occidentalis* From Lianas

275

| <b>Variable</b>     | <b>d.f.</b> | <b>Sum Sq</b> | <b>Mean Sq</b> | <b>F</b> | <b>P</b> |
|---------------------|-------------|---------------|----------------|----------|----------|
| <b>Site</b>         | 4           | 0.6932        | 0.1733         | 36.2827  | <0.0001  |
| <b>Species</b>      | 17          | 0.7233        | 0.0425         | 8.9079   | <0.0001  |
| <b>Site*Species</b> | 26          | 0.6097        | 0.0235         | 4.9100   | <0.0001  |
| <b>Residuals</b>    | 1493        | 7.1307        | 0.0048         |          |          |

276

277

278



Milks, J.R., J. Hibbard and T. P. Rooney. Exfoliating Bark Does Not Protect *Platanus occidentalis* L. From Lianas

278 Table Legend

279 **Table 3.** Number of stems, importance values per species per site, observed lianas  
280 abundance, expected liana abundance, and p-values for the five species of trees with  
281 overall importance values > 0.05 and which were found in three or more sites. N/A =  
282 species not recorded at that site. Bold P-value indicates statistical significance.

Milks, J.R., J. Hibbard and T. P. Rooney. Exfoliating Bark Does Not Protect *Platanus occidentalis* From Lianas

283

| Species                      | Site        | No. stems | Importance value per site | Lianas Obs. | Lianas Exp. | P-value |
|------------------------------|-------------|-----------|---------------------------|-------------|-------------|---------|
| <i>Acer negundo</i>          | Germantown  | 120       | 58.4                      | 11          | 13.43       | 0.3078  |
|                              | Huffman     | 142       | 22.9                      | 59          | 244.46      | <0.0001 |
|                              | Narrows     | 88        | 24.7                      | 75          | 110.98      | <0.0001 |
|                              | Sugarcreek  | 6         | 4.4                       | 0           | 8.36        | <0.0001 |
|                              | Taylorville | 76        | 14.3                      | 24          | 36.51       | 0.0181  |
| <i>Acer saccharinum</i>      | Germantown  | 26        | 15.12                     | 0           | 3.49        | 0.0059  |
|                              | Huffman     | 2         | 0.4                       | 0           | 4.72        | 0.0021  |
|                              | Narrows     | 0         | 0.0                       | N/A         | N/A         | N/A     |
|                              | Sugarcreek  | 0         | 0.0                       | N/A         | N/A         | N/A     |
|                              | Taylorville | 60        | 13.4                      | 10          | 34.28       | <0.0001 |
| <i>Celtis occidentalis</i>   | Germantown  | 4         | 1.9                       | 2           | 0.45        | 0.0831  |
|                              | Huffman     | 137       | 26.3                      | 454         | 280.57      | <0.0001 |
|                              | Narrows     | 6         | 1.7                       | 2           | 7.52        | 0.0159  |
|                              | Sugarcreek  | 4         | 3.0                       | 0           | 5.12        | 0.0013  |
|                              | Taylorville | 12        | 2.2                       | 24          | 5.67        | <0.0001 |
| <i>Fraxinus sp.</i>          | Germantown  | 0         | N/A                       | N/A         | N/A         | N/A     |
|                              | Huffman     | 5         | 1.1                       | 42          | 12.15       | <0.0001 |
|                              | Narrows     | 29        | 9.2                       | 39          | 41.47       | 0.6850  |
|                              | Sugarcreek  | 19        | 1.3                       | 4           | 19.16       | <0.0001 |
|                              | Taylorville | 12        | 2.7                       | 0           | 6.78        | 0.0002  |
| <i>Platanus occidentalis</i> | Germantown  | 24        | 18.3                      | 5           | 4.21        | 0.6779  |
|                              | Huffman     | 72        | 20.8                      | 286         | 221.71      | <0.0001 |
|                              | Narrows     | 105       | 39.9                      | 269         | 179.31      | <0.0001 |
|                              | Sugarcreek  | 50        | 48.8                      | 166         | 82.89       | <0.0001 |
|                              | Taylorville | 154       | 41.8                      | 48          | 106.87      | <0.0001 |

284

285

Milks, J.R., J. Hibbard and T. P. Rooney. Exfoliating Bark Does Not Protect *Platanus occidentalis* L. From Lianas

285

286 Figure Legend

287 **Fig. 1. A.** Estimated probability of at least one liana growing on a tree versus diameter

288 at breast height along with the estimated logistic regression curve. **B.** Truncated

289 Poisson regression of the number of lianas growing on trees versus diameter at breast

290 height.

Milks, J.R., J. Hibbard and T. P. Rooney. Exfoliating Bark Does Not Protect *Platanus occidentalis* From Lianas

291

292

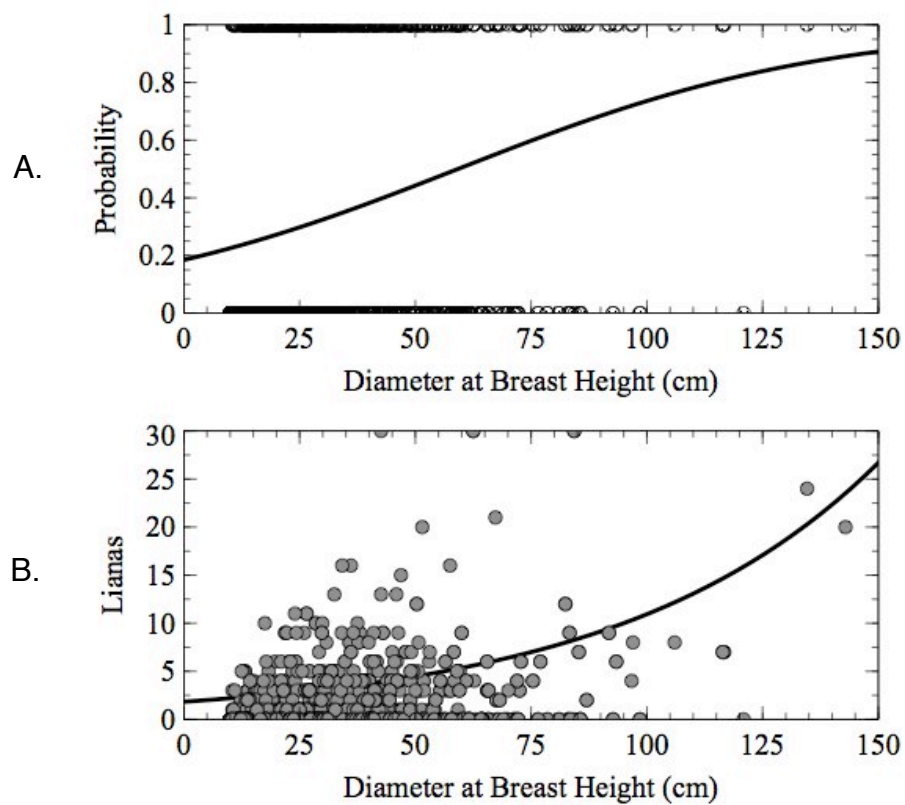

Milks, J.R., J. Hibbard and T. P. Rooney. Exfoliating Bark Does Not Protect *Platanus occidentalis* L. From Lianas

293

294 Figure Legend

295 **Fig. 2.** Mean ( $\pm$  SE) lianas per cm DBH per tree for each site. Sites that with  
296 significantly different means ( $p \leq 0.05$ ) based on Tukey's HSD test are denoted with  
297 different letters.

Milks, J.R., J. Hibbard and T. P. Rooney. Exfoliating Bark Does Not Protect *Platanus occidentalis* From Lianas

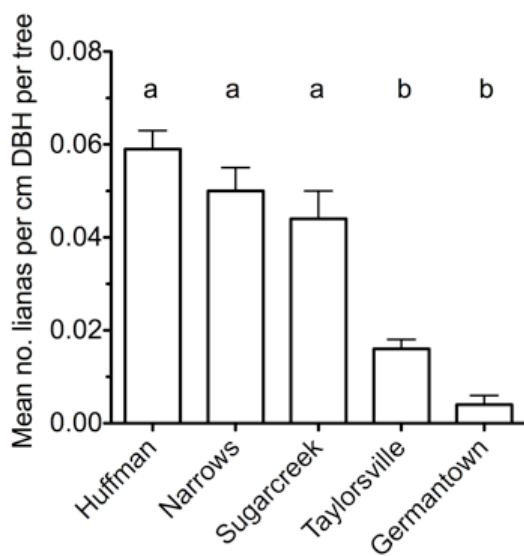

298
